# Supplementary material for: Impact of COVID-19 pandemic on the utilization of routine immunization services in Lebanon
Source: PLoS One. 2021 Feb 17;16(2):e0246951. doi: 10.1371/journal.pone.0246951 (PMC7888608; doi:10.1371/journal.pone.0246951)
Supplement: S2 File — (XLSX) [file pone.0246951.s002.xlsx]

## Sheet: Public Sector
	Public Sector
	Measles	OPV (Oral Polio Vaccine)	Penta (DTP, Hib, HepB)	IPV (Inactivated Polio Vaccine)	PCV13 (Pneumococcal vaccine)
2018-10-01	7747	18389	20677	8772	11947
2018-11-01	5956	17081	19391	8087	11727
2018-12-01	4091	14713	17021	6480	10375
Total	17794	50183	57089	23339	34049
	Measles	OPV (Oral Polio Vaccine)	Penta (DTP, Hib, HepB)	IPV (Inactivated Polio Vaccine)	PCV13 (Pneumococcal vaccine)
2019-01-01	4153	13635	20698	7493	12836
2019-02-01	4144	12619	18781	6596	11915
2019-03-01	8609	13420	20635	7441	13227
Total	16906	39674	60114	21530	37978
Row Labels	Measles	OPV (Oral Polio Vaccine)	Penta (DTP, Hib, HepB)	IPV (Inactivated Polio Vaccine)	PCV13 (Pneumococcal vaccine)
2019-10-01	4121	10060	16271	6482	9344
2019-11-01	4127	11891	19132	7335	8884
2019-12-01	3730	12009	18047	6552	11796
Total	11978	33960	53450	20369	30024
Row Labels	Measles	OPV (Oral Polio Vaccine)	Penta (DTP, Hib, HepB)	IPV (Inactivated Polio Vaccine)	PCV13 (Pneumococcal vaccine)
2020-01-01	3620	11945	18371	6513	12325
2020-02-01	3667	11585	17607	6092	12064
2020-03-01	2324	7454	11640	4228	7873
Total	9611	30984	47618	16833	32262

## Sheet: Private Sector
Doyouprovideroutineimmunizationservices	geo_akkar	geo_north	geo_ML	geo_beirut	geo_south	geo_bekaa	geo_nabatiyeh	geo_baalbackhermel	prefer_not_toanswer	Haveyouwitnessedanydecreaseinroutineimmunizationservices	Kindlyindicateanestimationoftheoveralldecreaserateinro	Overall_decline_percent	HaveyouwitnessedanydecreaseinthenumberofOPVvaccinesyo	Kindlyindicateanestimationofthedecreaserateinthenumber	decline_OPV	HaveyouwitnessedanydecreaseinthenumberofIPVcontaining	Kindlyindicateanestimationofthedecreaserateinthenumber_A	decline_IPV	Haveyouwitnessedanydecreaseinthenumberofmeaslesvaccine	Kindlyindicateanestimationofthedecreaserateinthenumber_B	decline_measles	HaveyouwitnessedanydecreaseinthenumberofDTPcontaining	Kindlyindicateanestimationofthedecreaserateinthenumber_C	decline_DTP	HaveyouwitnessedanydecreaseinthenumberofHepatitisBor	Kindlyindicateanestimationofthedecreaserateinthenumber_D	decline_hepb	Haveyouwitnessedanydecreaseinthenumberofmeaslesmumpsr	Kindlyindicateanestimationofthedecreaserateinthenumber_E	decline_MMR	HaveyouwitnessedanydecreaseinthenumberofPCVvaccinesyo	Kindlyindicateanestimationofthedecreaserateinthenumber_F	decline_PCV	HaveyouwitnessedanydecreaseinthenumberofHepatitisAvac	Kindlyindicateanestimationofthedecreaserateinthenumber_G	decline_hepA	Whichperiodhadthemostsignificantdropinroutinevaccinatio
Yes						Bekaa				Yes	I do not know		Yes	Decrease rate(%)	50	Yes	Decrease rate(%)	50	Yes	Decrease rate(%)	50	Yes	Decrease rate(%)	50	Yes	Decrease rate(%)	50	Yes	Decrease rate(%)	50	Yes	Decrease rate(%)	50	Yes	Decrease rate(%)	50	I do not know
Yes					South					Yes	I do not know		Yes	I do not know		Yes	I do not know		Yes	I do not know		Yes	I do not know		Yes	I do not know		Yes	I do not know		Yes	I do not know		Yes	I do not know		I do not know
Yes			Mount Lebanon							Yes	Decrease rate(%)	20	No			No			No			No			No			No			No			Yes	Decrease rate(%)	30	February-April 2020 (confinement period)
Yes			Mount Lebanon	Beirut						Yes	Decrease rate(%)	30	No			No			Yes	Decrease rate(%)	25	No			No			No			Yes	Decrease rate(%)	50	No			February-April 2020 (confinement period)
Yes			Mount Lebanon							Yes	Decrease rate(%)	20	I do not know			No			I do not know	Decrease rate(%)	30	No			No			Yes	Decrease rate(%)	30	No			No			February-April 2020 (confinement period)
Yes		North								Yes	I do not know		No			No			Yes	I do not know		No			No			Yes	I do not know		No			Yes	I do not know		February-April 2020 (confinement period)
Yes			Mount Lebanon							Yes	I do not know		No			Yes	I do not know		Yes	I do not know		Yes	I do not know		Yes	I do not know		Yes	I do not know		Yes	I do not know		Yes	I do not know		February-April 2020 (confinement period)
Yes				Beirut						Yes	I do not know		Yes	I do not know		Yes	I do not know		Yes	I do not know		Yes	I do not know		Yes	I do not know		Yes	I do not know		Yes	I do not know		Yes	I do not know		February-April 2020 (confinement period)
Yes							Nabatiyeh			Yes	Decrease rate(%)	50	Yes	Decrease rate(%)	30	No			No			No			No			No			Yes	Decrease rate(%)	50	Yes	Decrease rate(%)	60	February-April 2020 (confinement period)
Yes		North								Yes	Decrease rate(%)	50	Yes	Decrease rate(%)	50	Yes	Decrease rate(%)	50	Yes	Decrease rate(%)	50	Yes	Decrease rate(%)	50	Yes	Decrease rate(%)	50	Yes	Decrease rate(%)	50	Yes	Decrease rate(%)	90	Yes	Decrease rate(%)	60	February-April 2020 (confinement period)
Yes		North								Yes	Decrease rate(%)	5	I do not know			No			No			No			No			Yes	I do not know		Yes	I do not know		No			February-April 2020 (confinement period)
Yes		North								Yes	Decrease rate(%)	45	I do not know			Yes	Decrease rate(%)	20	Yes	Decrease rate(%)	10	Yes	Decrease rate(%)	10	Yes	Decrease rate(%)	10	Yes	Decrease rate(%)	10	Yes	Decrease rate(%)	20	No			February-April 2020 (confinement period)
Yes			Mount Lebanon				Nabatiyeh			Yes	Decrease rate(%)	75	Yes	Decrease rate(%)	75	Yes	Decrease rate(%)	75	Yes	Decrease rate(%)	75	Yes	Decrease rate(%)	75	Yes	Decrease rate(%)	75	Yes	Decrease rate(%)	75	Yes	Decrease rate(%)	90	Yes	Decrease rate(%)	90	February-April 2020 (confinement period)
Yes			Mount Lebanon							Yes	Decrease rate(%)	40	No			No			No			No			No			No			Yes	Decrease rate(%)	40	No			February-April 2020 (confinement period)
Yes					South					Yes	Decrease rate(%)	60	Yes	Decrease rate(%)	60	Yes	Decrease rate(%)	60	Yes	Decrease rate(%)	40	Yes	Decrease rate(%)	40	Yes	Decrease rate(%)	40	Yes	Decrease rate(%)	60	Yes	Decrease rate(%)	80	Yes	Decrease rate(%)	50	February-April 2020 (confinement period)
Yes					South					Yes	Decrease rate(%)	30	Yes	Decrease rate(%)	70	No			Yes	Decrease rate(%)	30	Yes	Decrease rate(%)	30	Yes	Decrease rate(%)	30	Yes	Decrease rate(%)	30	Yes	Decrease rate(%)	40	Yes	Decrease rate(%)	50	February-April 2020 (confinement period)
Yes			Mount Lebanon							Yes	Decrease rate(%)	50	I prefer not to answer	Decrease rate(%)	50	Yes	Decrease rate(%)	50	Yes	Decrease rate(%)	50	Yes	Decrease rate(%)	50	Yes	Decrease rate(%)	50	Yes	Decrease rate(%)	50	Yes	Decrease rate(%)	50	Yes	Decrease rate(%)	50	February-April 2020 (confinement period)
Yes			Mount Lebanon							Yes	Decrease rate(%)	25	No			No			Yes	Decrease rate(%)	25	No			No			Yes	Decrease rate(%)	25	Yes	Decrease rate(%)	25	Yes	Decrease rate(%)	30	February-April 2020 (confinement period)
Yes				Beirut						Yes	Decrease rate(%)	30	Yes	Decrease rate(%)	30	Yes	Decrease rate(%)	30	Yes	Decrease rate(%)	40	Yes	Decrease rate(%)	30	Yes	Decrease rate(%)	30	Yes	Decrease rate(%)	40	Yes	Decrease rate(%)	30	Yes	Decrease rate(%)	40	February-April 2020 (confinement period)
Yes				Beirut	South					Yes	Decrease rate(%)	70	Yes	Decrease rate(%)	70	Yes	Decrease rate(%)	70	Yes	Decrease rate(%)	80	Yes	Decrease rate(%)	70	Yes	Decrease rate(%)	60	Yes	Decrease rate(%)	80	Yes	Decrease rate(%)	90	Yes	Decrease rate(%)	65	February-April 2020 (confinement period)
Yes			Mount Lebanon	Beirut						Yes	Decrease rate(%)	70	Yes	I do not know		Yes	Decrease rate(%)	70	Yes	Decrease rate(%)	70	Yes	Decrease rate(%)	70	Yes	Decrease rate(%)	70	Yes	Decrease rate(%)	50	Yes	Decrease rate(%)	80	Yes	I do not know		February-April 2020 (confinement period)
Yes			Mount Lebanon							Yes	Decrease rate(%)	30	No			No			No			No			No			No			Yes	Decrease rate(%)	30	Yes	Decrease rate(%)	50	February-April 2020 (confinement period)
Yes			Mount Lebanon							Yes	Decrease rate(%)	30	No			Yes	Decrease rate(%)	30	No			No			No			No			No			Yes	I do not know		February-April 2020 (confinement period)
Yes						Bekaa				Yes	I do not know		No			Yes	I do not know		No			Yes	I do not know		No			No			Yes	I do not know		Yes	Decrease rate(%)	50	February-April 2020 (confinement period)
Yes					South					Yes	I do not know		Yes	I do not know		Yes	I do not know		Yes	I do not know		Yes	I do not know		Yes	I do not know		Yes	I do not know		Yes	I do not know		Yes	I do not know		February-April 2020 (confinement period)
Yes						Bekaa				Yes	Decrease rate(%)	30	No			Yes	Decrease rate(%)	30	Yes	Decrease rate(%)	100	Yes	Decrease rate(%)	30	Yes	Decrease rate(%)	30	No			Yes	Decrease rate(%)	15	Yes	Decrease rate(%)	30	February-April 2020 (confinement period)
Yes			Mount Lebanon	Beirut						Yes	Decrease rate(%)	40	No			Yes	I do not know		I do not know			No	I do not know		No			No			Yes	Decrease rate(%)	20	Yes	I do not know		February-April 2020 (confinement period)
Yes			Mount Lebanon							Yes	Decrease rate(%)	50	Yes	I do not know		Yes	I do not know		Yes	I do not know		Yes	I do not know		Yes	I do not know		Yes	I do not know		Yes	I do not know		Yes	I do not know		February-April 2020 (confinement period)
Yes				Beirut						Yes	Decrease rate(%)	90	Yes	I do not know		Yes	Decrease rate(%)	90	Yes	Decrease rate(%)	90	Yes	Decrease rate(%)	90	Yes	Decrease rate(%)	90	Yes	Decrease rate(%)	90	Yes	Decrease rate(%)	90	Yes	Decrease rate(%)	90	February-April 2020 (confinement period)
Yes				Beirut						Yes	Decrease rate(%)	70	Yes	Decrease rate(%)	70	Yes	Decrease rate(%)	70	Yes	Decrease rate(%)	80	Yes	Decrease rate(%)	70	Yes	Decrease rate(%)	70	Yes	Decrease rate(%)	90	Yes	Decrease rate(%)	80	Yes	Decrease rate(%)	80	February-April 2020 (confinement period)
Yes			Mount Lebanon							Yes	Decrease rate(%)	20	No			No			No			Yes	Decrease rate(%)	10	No			No			Yes	Decrease rate(%)	60	No			February-April 2020 (confinement period)
Yes			Mount Lebanon							Yes	Decrease rate(%)	50	I do not know			No			No			No			No			No			Yes	Decrease rate(%)	30	No			February-April 2020 (confinement period)
Yes			Mount Lebanon							Yes	I do not know		No			Yes	I do not know		No			Yes	I do not know		No			No			No			Yes	I do not know		February-April 2020 (confinement period)
Yes			Mount Lebanon							Yes	Decrease rate(%)	40	No			Yes	Decrease rate(%)	40	Yes	Decrease rate(%)	80	Yes	Decrease rate(%)	40	Yes	Decrease rate(%)	40	Yes	Decrease rate(%)	40	Yes	Decrease rate(%)	50	No			February-April 2020 (confinement period)
Yes				Beirut						Yes	I prefer not to answer		Yes	I prefer not to answer		Yes	I prefer not to answer		Yes	I prefer not to answer		Yes	I prefer not to answer		Yes	I prefer not to answer		Yes	I prefer not to answer		Yes	I prefer not to answer		Yes	I prefer not to answer		February-April 2020 (confinement period)
Yes			Mount Lebanon							Yes	Decrease rate(%)	35	Yes	Decrease rate(%)	35	Yes	Decrease rate(%)	35	Yes	I do not know		Yes	I do not know		Yes	Decrease rate(%)	75	Yes	I do not know		I prefer not to answer			I prefer not to answer			February-April 2020 (confinement period)
Yes			Mount Lebanon							Yes	Decrease rate(%)	40	No			No			No			No			No			No			Yes	Decrease rate(%)	50	No			February-April 2020 (confinement period)
Yes		North								Yes	Decrease rate(%)	70	Yes	Decrease rate(%)	80	Yes	Decrease rate(%)	75	Yes	Decrease rate(%)	80	Yes	Decrease rate(%)	80	Yes	Decrease rate(%)	80	Yes	Decrease rate(%)	85	Yes	Decrease rate(%)	90	Yes	Decrease rate(%)	90	February-April 2020 (confinement period)
Yes		North								Yes	Decrease rate(%)	80	Yes	Decrease rate(%)	80	Yes	Decrease rate(%)	80	Yes	Decrease rate(%)	80	Yes	Decrease rate(%)	80	Yes	Decrease rate(%)	80	Yes	Decrease rate(%)	80	Yes	Decrease rate(%)	80	Yes	Decrease rate(%)	80	February-April 2020 (confinement period)
Yes			Mount Lebanon							Yes	I do not know		Yes	I do not know		Yes	I do not know		Yes	I do not know		Yes	I do not know		Yes	I do not know		Yes	I do not know		Yes	I do not know		Yes	I do not know		February-April 2020 (confinement period)
Yes			Mount Lebanon							Yes	Decrease rate(%)	50	Yes	Decrease rate(%)	50	Yes	Decrease rate(%)	40	I prefer not to answer	Decrease rate(%)	50	Yes	Decrease rate(%)	40	Yes	Decrease rate(%)	60	Yes	Decrease rate(%)	50	Yes	Decrease rate(%)	70	Yes	Decrease rate(%)	80	February-April 2020 (confinement period)
Yes						Bekaa				Yes	Decrease rate(%)	50	Yes	Decrease rate(%)	50	Yes	Decrease rate(%)	50	Yes	Decrease rate(%)	50	Yes	Decrease rate(%)	50	Yes	Decrease rate(%)	50	Yes	Decrease rate(%)	40	Yes	Decrease rate(%)	60	Yes	Decrease rate(%)	70	February-April 2020 (confinement period)
Yes				Beirut						Yes	Decrease rate(%)	30	I prefer not to answer			Yes	Decrease rate(%)	30	Yes	Decrease rate(%)	30	Yes	Decrease rate(%)	30	No			No			No			I prefer not to answer			February-April 2020 (confinement period)
Yes					South					Yes	Decrease rate(%)	50	Yes	Decrease rate(%)	100	Yes	Decrease rate(%)	50	Yes	Decrease rate(%)	50	Yes	Decrease rate(%)	50	Yes	Decrease rate(%)	50	Yes	Decrease rate(%)	50	Yes	Decrease rate(%)	50	Yes	Decrease rate(%)	50	February-April 2020 (confinement period)
Yes			Mount Lebanon							Yes	I do not know		No			No			No			No			No			No			No			No			February-April 2020 (confinement period)
Yes		North								Yes	Decrease rate(%)	70	No			No			No			Yes	Decrease rate(%)	40	No			No			Yes	Decrease rate(%)	50	Yes	Decrease rate(%)	40	February-April 2020 (confinement period)
Yes			Mount Lebanon							Yes	Decrease rate(%)	30	I do not know			Yes	Decrease rate(%)	30	Yes	Decrease rate(%)	30	Yes	Decrease rate(%)	30	Yes	Decrease rate(%)	30	Yes	Decrease rate(%)	30	Yes	Decrease rate(%)	30	Yes	Decrease rate(%)	30	February-April 2020 (confinement period)
Yes			Mount Lebanon							Yes	I do not know		No			No			No			No			No			No			Yes	I do not know		No			February-April 2020 (confinement period)
Yes			Mount Lebanon							Yes	Decrease rate(%)	40	No			No			No			No			No			No			No			No			February-April 2020 (confinement period)
Yes			Mount Lebanon							Yes	I do not know		Yes	I do not know		Yes	I do not know		No			Yes	I do not know		Yes	I do not know		Yes	I do not know		Yes	I do not know		Yes	I do not know		February-April 2020 (confinement period)
Yes				Beirut						Yes	I do not know		No			Yes	I do not know		Yes	I do not know		Yes	I do not know		Yes	I do not know		Yes	I do not know		Yes	I do not know		Yes	I do not know		February-April 2020 (confinement period)
Yes			Mount Lebanon							Yes	Decrease rate(%)	50	Yes	Decrease rate(%)	100	No			Yes	Decrease rate(%)	100	Yes	Decrease rate(%)	50	Yes	Decrease rate(%)	70	Yes	Decrease rate(%)	50	No			Yes	Decrease rate(%)	70	February-April 2020 (confinement period)
Yes			Mount Lebanon	Beirut						Yes	Decrease rate(%)	70	I prefer not to answer			Yes	Decrease rate(%)	70	Yes	Decrease rate(%)	70	Yes	I do not know		I do not know			Yes	Decrease rate(%)	70	Yes	I do not know		Yes	Decrease rate(%)	75	February-April 2020 (confinement period)
Yes			Mount Lebanon							Yes	Decrease rate(%)	80	Yes	Decrease rate(%)	80	Yes	Decrease rate(%)	80	Yes	Decrease rate(%)	70	Yes	Decrease rate(%)	70	Yes	Decrease rate(%)	70	Yes	Decrease rate(%)	70	Yes	Decrease rate(%)	90	Yes	Decrease rate(%)	90	February-April 2020 (confinement period)
Yes			Mount Lebanon							Yes	Decrease rate(%)	50	Yes	Decrease rate(%)	50	Yes	Decrease rate(%)	50	Yes	Decrease rate(%)	40	Yes	Decrease rate(%)	40	Yes	Decrease rate(%)	40	Yes	Decrease rate(%)	40	Yes	Decrease rate(%)	40	Yes	Decrease rate(%)	50	February-April 2020 (confinement period)
Yes			Mount Lebanon							Yes	I do not know		I prefer not to answer			Yes	I do not know		Yes	I do not know		Yes	I do not know		Yes	I do not know		Yes	I do not know		Yes	I do not know		Yes	I do not know		February-April 2020 (confinement period)
Yes					South					Yes	I do not know		I do not know	Decrease rate(%)	30	Yes	Decrease rate(%)	30	I do not know	I do not know		Yes	Decrease rate(%)	40	Yes	Decrease rate(%)	40	Yes	Decrease rate(%)	30	Yes	I do not know		Yes	Decrease rate(%)	40	February-April 2020 (confinement period)
Yes				Beirut						Yes	Decrease rate(%)	90	I do not know			Yes	Decrease rate(%)	90	Yes	Decrease rate(%)	95	Yes	Decrease rate(%)	90	Yes	Decrease rate(%)	5	Yes	Decrease rate(%)	95	Yes	Decrease rate(%)	20	Yes	Decrease rate(%)	90	February-April 2020 (confinement period)
Yes		North								Yes	Decrease rate(%)	50	No			Yes	Decrease rate(%)	50	Yes	Decrease rate(%)	50	Yes	Decrease rate(%)	50	Yes	Decrease rate(%)	80	Yes	Decrease rate(%)	80	Yes	Decrease rate(%)	50	Yes	Decrease rate(%)	80	February-April 2020 (confinement period)
Yes			Mount Lebanon							Yes	Decrease rate(%)	40	I do not know			Yes	Decrease rate(%)	20	Yes	Decrease rate(%)	10	Yes	Decrease rate(%)	20	Yes	Decrease rate(%)	20	Yes	Decrease rate(%)	10	Yes	Decrease rate(%)	50	Yes	Decrease rate(%)	50	February-April 2020 (confinement period)
Yes			Mount Lebanon							Yes	I do not know		Yes	I do not know		Yes	I do not know		Yes	I do not know		Yes	I do not know		Yes	I do not know		Yes	I do not know		Yes	I do not know		Yes	I do not know		February-April 2020 (confinement period)
Yes			Mount Lebanon							Yes	Decrease rate(%)	20	No			No			No			No			No			No			No			Yes	Decrease rate(%)	15	February-April 2020 (confinement period)
Yes									I prefer not to answer	Yes	I do not know		Yes	I do not know		Yes	I do not know		Yes	I do not know		Yes	I do not know		Yes	I do not know		Yes	I do not know		Yes	I do not know		Yes	I do not know		February-April 2020 (confinement period)
Yes				Beirut						Yes	Decrease rate(%)	40	Yes	Decrease rate(%)	40	Yes	Decrease rate(%)	40	Yes	Decrease rate(%)	40	Yes	Decrease rate(%)	40	Yes	Decrease rate(%)	40	Yes	Decrease rate(%)	50	Yes	Decrease rate(%)	60	Yes	Decrease rate(%)	60	February-April 2020 (confinement period)
Yes			Mount Lebanon							Yes	I do not know		Yes	I do not know		Yes	I do not know		Yes	I do not know		Yes	I do not know		Yes	I do not know		Yes	I do not know		Yes	I do not know		Yes	I do not know		February-April 2020 (confinement period)
Yes					South					Yes	I prefer not to answer		Yes	I prefer not to answer		Yes	I prefer not to answer		Yes	I prefer not to answer		Yes	I prefer not to answer		Yes	I prefer not to answer		Yes	I prefer not to answer		Yes	I prefer not to answer		Yes	I prefer not to answer		February-April 2020 (confinement period)
Yes			Mount Lebanon							Yes	Decrease rate(%)	20	No			No			No			No			No			No			No			No			February-April 2020 (confinement period)
Yes							Nabatiyeh			Yes	Decrease rate(%)	80	I prefer not to answer			Yes	Decrease rate(%)	50	Yes	Decrease rate(%)	50	Yes	I do not know		Yes	Decrease rate(%)	50	Yes	Decrease rate(%)	50	Yes	Decrease rate(%)	50	Yes	Decrease rate(%)	50	February-April 2020 (confinement period)
Yes							Nabatiyeh			Yes	Decrease rate(%)	50	I prefer not to answer			Yes	Decrease rate(%)	30	Yes	Decrease rate(%)	30	Yes	Decrease rate(%)	35	Yes	Decrease rate(%)	35	Yes	Decrease rate(%)	35	Yes	Decrease rate(%)	70	Yes	Decrease rate(%)	70	February-April 2020 (confinement period)
Yes				Beirut						Yes	I do not know		Yes	Decrease rate(%)	60	Yes	Decrease rate(%)	60	Yes	Decrease rate(%)	70	Yes	Decrease rate(%)	60	Yes	Decrease rate(%)	70	Yes	Decrease rate(%)	50	Yes	Decrease rate(%)	70	Yes	Decrease rate(%)	80	February-April 2020 (confinement period)
Yes			Mount Lebanon							Yes	I do not know		Yes	Decrease rate(%)	30	Yes	I do not know		Yes	I do not know		Yes	I prefer not to answer		Yes	I prefer not to answer		No			Yes	I do not know		Yes	Decrease rate(%)	30	February-April 2020 (confinement period)
Yes			Mount Lebanon							Yes	I prefer not to answer		No			No			Yes	I do not know		No			No			Yes	I do not know		Yes	I do not know		No			February-April 2020 (confinement period)
Yes			Mount Lebanon	Beirut						Yes	I do not know		Yes	I do not know		Yes	I do not know		Yes	I do not know		Yes	I do not know		Yes	I do not know		Yes	I do not know		Yes	I do not know		Yes	I do not know		February-April 2020 (confinement period)
Yes			Mount Lebanon							Yes	I do not know		Yes	I do not know		No			No			No			No			No			Yes	I do not know		No			February-April 2020 (confinement period)
Yes			Mount Lebanon							Yes	Decrease rate(%)	50	Yes	I do not know		Yes	I do not know		Yes	I do not know		Yes	I do not know		Yes	I do not know		Yes	I do not know		Yes	I do not know		Yes	I do not know		February-April 2020 (confinement period)
Yes			Mount Lebanon							Yes	I do not know		No			No			Yes	I do not know		No			No			Yes	I do not know		Yes	I do not know		Yes	I prefer not to answer		February-April 2020 (confinement period)
Yes			Mount Lebanon							Yes	Decrease rate(%)	50	I do not know			Yes	Decrease rate(%)	25	No			Yes	Decrease rate(%)	25	Yes	Decrease rate(%)	25	No			Yes	Decrease rate(%)	25	Yes	Decrease rate(%)	50	February-April 2020 (confinement period)
Yes			Mount Lebanon	Beirut						Yes	Decrease rate(%)	30	No			Yes	Decrease rate(%)	30	Yes	Decrease rate(%)	30	Yes	Decrease rate(%)	30	Yes	Decrease rate(%)	30	Yes	Decrease rate(%)	20	Yes	Decrease rate(%)	40	Yes	Decrease rate(%)	50	February-April 2020 (confinement period)
Yes			Mount Lebanon							Yes	Decrease rate(%)	40	No			Yes	Decrease rate(%)	20	No			Yes	Decrease rate(%)	20	No			Yes	Decrease rate(%)	10	No			Yes	Decrease rate(%)	25	February-April 2020 (confinement period)
Yes			Mount Lebanon							Yes	I do not know		Yes	I do not know		Yes	I do not know		Yes	I do not know		Yes	I do not know		Yes	I do not know		Yes	I do not know		Yes	I do not know		Yes	I do not know		February-April 2020 (confinement period)
Yes				Beirut						Yes	Decrease rate(%)	50	No			Yes	I do not know		Yes	I do not know		Yes	I do not know		Yes	I do not know		Yes	I do not know		Yes	I do not know		Yes	I do not know		December 2019-January 2020
Yes					South					Yes	I do not know		Yes	Decrease rate(%)	30	Yes	Decrease rate(%)	30	Yes	Decrease rate(%)	30	Yes	Decrease rate(%)	30	Yes	Decrease rate(%)	30	Yes	Decrease rate(%)	30	Yes	Decrease rate(%)	30	Yes	Decrease rate(%)	30	December 2019-January 2020
Yes						Bekaa				Yes	I do not know		I do not know			I do not know			I do not know			I do not know			I do not know			Yes	I do not know		I do not know			I do not know			December 2019-January 2020
Yes				Beirut						Yes	Decrease rate(%)	30	I prefer not to answer			No			No			No			No			No			No			Yes	I do not know		December 2019-January 2020
Yes			Mount Lebanon							Yes	I prefer not to answer		Yes	Decrease rate(%)	85	I prefer not to answer			I prefer not to answer			I prefer not to answer			I prefer not to answer			I prefer not to answer			I prefer not to answer			Yes	Decrease rate(%)	85	December 2019-January 2020
Yes				Beirut						Yes	I do not know		Yes	I do not know		Yes	I do not know		Yes	I do not know		Yes	I do not know		Yes	I do not know		Yes	I do not know		Yes	I do not know		Yes	I do not know		December 2019-January 2020
Yes					South					Yes	Decrease rate(%)	70	Yes	Decrease rate(%)	40	Yes	Decrease rate(%)	40	Yes	Decrease rate(%)	50	Yes	Decrease rate(%)	40	Yes	Decrease rate(%)	40	Yes	Decrease rate(%)	50	Yes	Decrease rate(%)	60	Yes	Decrease rate(%)	60	December 2019-January 2020
Yes				Beirut						Yes	Decrease rate(%)	50	I do not know			Yes	Decrease rate(%)	50	Yes	Decrease rate(%)	50	Yes	Decrease rate(%)	50	Yes	Decrease rate(%)	50	Yes	Decrease rate(%)	50	Yes	Decrease rate(%)	50	Yes	Decrease rate(%)	50	October-November 2019
Yes				Beirut						Yes	I do not know		No			No			No			No			No			No			Yes	I do not know		Yes	I do not know		October-November 2019
Yes						Bekaa				Yes	I do not know		Yes	Decrease rate(%)	50	Yes	Decrease rate(%)	50	Yes	Decrease rate(%)	50	Yes	Decrease rate(%)	50	Yes	Decrease rate(%)	50	Yes	Decrease rate(%)	50	Yes	Decrease rate(%)	50	Yes	Decrease rate(%)	50	I do not know
Yes					South					Yes	I do not know		Yes	I do not know		Yes	I do not know		Yes	I do not know		Yes	I do not know		Yes	I do not know		Yes	I do not know		Yes	I do not know		Yes	I do not know		I do not know
Yes			Mount Lebanon							Yes	Decrease rate(%)	20	No			No			No			No			No			No			No			Yes	Decrease rate(%)	30	February-April 2020 (confinement period)
Yes			Mount Lebanon	Beirut						Yes	Decrease rate(%)	30	No			No			Yes	Decrease rate(%)	25	No			No			No			Yes	Decrease rate(%)	50	No			February-April 2020 (confinement period)
Yes			Mount Lebanon							Yes	Decrease rate(%)	20	I do not know			No			I do not know	Decrease rate(%)	30	No			No			Yes	Decrease rate(%)	30	No			No			February-April 2020 (confinement period)
Yes		North								Yes	I do not know		No			No			Yes	I do not know		No			No			Yes	I do not know		No			Yes	I do not know		February-April 2020 (confinement period)
Yes			Mount Lebanon							Yes	I do not know		No			Yes	I do not know		Yes	I do not know		Yes	I do not know		Yes	I do not know		Yes	I do not know		Yes	I do not know		Yes	I do not know		February-April 2020 (confinement period)
Yes				Beirut						Yes	I do not know		Yes	I do not know		Yes	I do not know		Yes	I do not know		Yes	I do not know		Yes	I do not know		Yes	I do not know		Yes	I do not know		Yes	I do not know		February-April 2020 (confinement period)
Yes							Nabatiyeh			Yes	Decrease rate(%)	50	Yes	Decrease rate(%)	30	No			No			No			No			No			Yes	Decrease rate(%)	50	Yes	Decrease rate(%)	60	February-April 2020 (confinement period)
Yes		North								Yes	Decrease rate(%)	50	Yes	Decrease rate(%)	50	Yes	Decrease rate(%)	50	Yes	Decrease rate(%)	50	Yes	Decrease rate(%)	50	Yes	Decrease rate(%)	50	Yes	Decrease rate(%)	50	Yes	Decrease rate(%)	90	Yes	Decrease rate(%)	60	February-April 2020 (confinement period)
Yes		North								Yes	Decrease rate(%)	5	I do not know			No			No			No			No			Yes	I do not know		Yes	I do not know		No			February-April 2020 (confinement period)
Yes		North								Yes	Decrease rate(%)	45	I do not know			Yes	Decrease rate(%)	20	Yes	Decrease rate(%)	10	Yes	Decrease rate(%)	10	Yes	Decrease rate(%)	10	Yes	Decrease rate(%)	10	Yes	Decrease rate(%)	20	No			February-April 2020 (confinement period)
Yes			Mount Lebanon				Nabatiyeh			Yes	Decrease rate(%)	75	Yes	Decrease rate(%)	75	Yes	Decrease rate(%)	75	Yes	Decrease rate(%)	75	Yes	Decrease rate(%)	75	Yes	Decrease rate(%)	75	Yes	Decrease rate(%)	75	Yes	Decrease rate(%)	90	Yes	Decrease rate(%)	90	February-April 2020 (confinement period)
Yes			Mount Lebanon							Yes	Decrease rate(%)	40	No			No			No			No			No			No			Yes	Decrease rate(%)	40	No			February-April 2020 (confinement period)
Yes					South					Yes	Decrease rate(%)	60	Yes	Decrease rate(%)	60	Yes	Decrease rate(%)	60	Yes	Decrease rate(%)	40	Yes	Decrease rate(%)	40	Yes	Decrease rate(%)	40	Yes	Decrease rate(%)	60	Yes	Decrease rate(%)	80	Yes	Decrease rate(%)	50	February-April 2020 (confinement period)
Yes					South					Yes	Decrease rate(%)	30	Yes	Decrease rate(%)	70	No			Yes	Decrease rate(%)	30	Yes	Decrease rate(%)	30	Yes	Decrease rate(%)	30	Yes	Decrease rate(%)	30	Yes	Decrease rate(%)	40	Yes	Decrease rate(%)	50	February-April 2020 (confinement period)
Yes			Mount Lebanon							Yes	Decrease rate(%)	50	I prefer not to answer	Decrease rate(%)	50	Yes	Decrease rate(%)	50	Yes	Decrease rate(%)	50	Yes	Decrease rate(%)	50	Yes	Decrease rate(%)	50	Yes	Decrease rate(%)	50	Yes	Decrease rate(%)	50	Yes	Decrease rate(%)	50	February-April 2020 (confinement period)
Yes			Mount Lebanon							Yes	Decrease rate(%)	25	No			No			Yes	Decrease rate(%)	25	No			No			Yes	Decrease rate(%)	25	Yes	Decrease rate(%)	25	Yes	Decrease rate(%)	30	February-April 2020 (confinement period)
Yes				Beirut						Yes	Decrease rate(%)	30	Yes	Decrease rate(%)	30	Yes	Decrease rate(%)	30	Yes	Decrease rate(%)	40	Yes	Decrease rate(%)	30	Yes	Decrease rate(%)	30	Yes	Decrease rate(%)	40	Yes	Decrease rate(%)	30	Yes	Decrease rate(%)	40	February-April 2020 (confinement period)
Yes				Beirut	South					Yes	Decrease rate(%)	70	Yes	Decrease rate(%)	70	Yes	Decrease rate(%)	70	Yes	Decrease rate(%)	80	Yes	Decrease rate(%)	70	Yes	Decrease rate(%)	60	Yes	Decrease rate(%)	80	Yes	Decrease rate(%)	90	Yes	Decrease rate(%)	65	February-April 2020 (confinement period)
Yes			Mount Lebanon	Beirut						Yes	Decrease rate(%)	70	Yes	I do not know		Yes	Decrease rate(%)	70	Yes	Decrease rate(%)	70	Yes	Decrease rate(%)	70	Yes	Decrease rate(%)	70	Yes	Decrease rate(%)	50	Yes	Decrease rate(%)	80	Yes	I do not know		February-April 2020 (confinement period)
Yes			Mount Lebanon							Yes	Decrease rate(%)	30	No			No			No			No			No			No			Yes	Decrease rate(%)	30	Yes	Decrease rate(%)	50	February-April 2020 (confinement period)
Yes			Mount Lebanon							Yes	Decrease rate(%)	30	No			Yes	Decrease rate(%)	30	No			No			No			No			No			Yes	I do not know		February-April 2020 (confinement period)
Yes						Bekaa				Yes	I do not know		No			Yes	I do not know		No			Yes	I do not know		No			No			Yes	I do not know		Yes	Decrease rate(%)	50	February-April 2020 (confinement period)
Yes					South					Yes	I do not know		Yes	I do not know		Yes	I do not know		Yes	I do not know		Yes	I do not know		Yes	I do not know		Yes	I do not know		Yes	I do not know		Yes	I do not know		February-April 2020 (confinement period)
Yes						Bekaa				Yes	Decrease rate(%)	30	No			Yes	Decrease rate(%)	30	Yes	Decrease rate(%)	100	Yes	Decrease rate(%)	30	Yes	Decrease rate(%)	30	No			Yes	Decrease rate(%)	15	Yes	Decrease rate(%)	30	February-April 2020 (confinement period)
Yes			Mount Lebanon	Beirut						Yes	Decrease rate(%)	40	No			Yes	I do not know		I do not know			No	I do not know		No			No			Yes	Decrease rate(%)	20	Yes	I do not know		February-April 2020 (confinement period)
Yes			Mount Lebanon							Yes	Decrease rate(%)	50	Yes	I do not know		Yes	I do not know		Yes	I do not know		Yes	I do not know		Yes	I do not know		Yes	I do not know		Yes	I do not know		Yes	I do not know		February-April 2020 (confinement period)
Yes				Beirut						Yes	Decrease rate(%)	90	Yes	I do not know		Yes	Decrease rate(%)	90	Yes	Decrease rate(%)	90	Yes	Decrease rate(%)	90	Yes	Decrease rate(%)	90	Yes	Decrease rate(%)	90	Yes	Decrease rate(%)	90	Yes	Decrease rate(%)	90	February-April 2020 (confinement period)
Yes				Beirut						Yes	Decrease rate(%)	70	Yes	Decrease rate(%)	70	Yes	Decrease rate(%)	70	Yes	Decrease rate(%)	80	Yes	Decrease rate(%)	70	Yes	Decrease rate(%)	70	Yes	Decrease rate(%)	90	Yes	Decrease rate(%)	80	Yes	Decrease rate(%)	80	February-April 2020 (confinement period)
Yes			Mount Lebanon							Yes	Decrease rate(%)	20	No			No			No			Yes	Decrease rate(%)	10	No			No			Yes	Decrease rate(%)	60	No			February-April 2020 (confinement period)
Yes			Mount Lebanon							Yes	Decrease rate(%)	50	I do not know			No			No			No			No			No			Yes	Decrease rate(%)	30	No			February-April 2020 (confinement period)
Yes			Mount Lebanon							Yes	I do not know		No			Yes	I do not know		No			Yes	I do not know		No			No			No			Yes	I do not know		February-April 2020 (confinement period)
Yes			Mount Lebanon							Yes	Decrease rate(%)	40	No			Yes	Decrease rate(%)	40	Yes	Decrease rate(%)	80	Yes	Decrease rate(%)	40	Yes	Decrease rate(%)	40	Yes	Decrease rate(%)	40	Yes	Decrease rate(%)	50	No			February-April 2020 (confinement period)
Yes				Beirut						Yes	I prefer not to answer		Yes	I prefer not to answer		Yes	I prefer not to answer		Yes	I prefer not to answer		Yes	I prefer not to answer		Yes	I prefer not to answer		Yes	I prefer not to answer		Yes	I prefer not to answer		Yes	I prefer not to answer		February-April 2020 (confinement period)
Yes			Mount Lebanon							Yes	Decrease rate(%)	35	Yes	Decrease rate(%)	35	Yes	Decrease rate(%)	35	Yes	I do not know		Yes	I do not know		Yes	Decrease rate(%)	75	Yes	I do not know		I prefer not to answer			I prefer not to answer			February-April 2020 (confinement period)
Yes			Mount Lebanon							Yes	Decrease rate(%)	40	No			No			No			No			No			No			Yes	Decrease rate(%)	50	No			February-April 2020 (confinement period)
Yes		North								Yes	Decrease rate(%)	70	Yes	Decrease rate(%)	80	Yes	Decrease rate(%)	75	Yes	Decrease rate(%)	80	Yes	Decrease rate(%)	80	Yes	Decrease rate(%)	80	Yes	Decrease rate(%)	85	Yes	Decrease rate(%)	90	Yes	Decrease rate(%)	90	February-April 2020 (confinement period)
Yes		North								Yes	Decrease rate(%)	80	Yes	Decrease rate(%)	80	Yes	Decrease rate(%)	80	Yes	Decrease rate(%)	80	Yes	Decrease rate(%)	80	Yes	Decrease rate(%)	80	Yes	Decrease rate(%)	80	Yes	Decrease rate(%)	80	Yes	Decrease rate(%)	80	February-April 2020 (confinement period)
Yes			Mount Lebanon							Yes	I do not know		Yes	I do not know		Yes	I do not know		Yes	I do not know		Yes	I do not know		Yes	I do not know		Yes	I do not know		Yes	I do not know		Yes	I do not know		February-April 2020 (confinement period)
Yes			Mount Lebanon							Yes	Decrease rate(%)	50	Yes	Decrease rate(%)	50	Yes	Decrease rate(%)	40	I prefer not to answer	Decrease rate(%)	50	Yes	Decrease rate(%)	40	Yes	Decrease rate(%)	60	Yes	Decrease rate(%)	50	Yes	Decrease rate(%)	70	Yes	Decrease rate(%)	80	February-April 2020 (confinement period)
Yes						Bekaa				Yes	Decrease rate(%)	50	Yes	Decrease rate(%)	50	Yes	Decrease rate(%)	50	Yes	Decrease rate(%)	50	Yes	Decrease rate(%)	50	Yes	Decrease rate(%)	50	Yes	Decrease rate(%)	40	Yes	Decrease rate(%)	60	Yes	Decrease rate(%)	70	February-April 2020 (confinement period)
Yes				Beirut						Yes	Decrease rate(%)	30	I prefer not to answer			Yes	Decrease rate(%)	30	Yes	Decrease rate(%)	30	Yes	Decrease rate(%)	30	No			No			No			I prefer not to answer			February-April 2020 (confinement period)
Yes					South					Yes	Decrease rate(%)	50	Yes	Decrease rate(%)	100	Yes	Decrease rate(%)	50	Yes	Decrease rate(%)	50	Yes	Decrease rate(%)	50	Yes	Decrease rate(%)	50	Yes	Decrease rate(%)	50	Yes	Decrease rate(%)	50	Yes	Decrease rate(%)	50	February-April 2020 (confinement period)
Yes			Mount Lebanon							Yes	I do not know		No			No			No			No			No			No			No			No			February-April 2020 (confinement period)
Yes		North								Yes	Decrease rate(%)	70	No			No			No			Yes	Decrease rate(%)	40	No			No			Yes	Decrease rate(%)	50	Yes	Decrease rate(%)	40	February-April 2020 (confinement period)
Yes			Mount Lebanon							Yes	Decrease rate(%)	30	I do not know			Yes	Decrease rate(%)	30	Yes	Decrease rate(%)	30	Yes	Decrease rate(%)	30	Yes	Decrease rate(%)	30	Yes	Decrease rate(%)	30	Yes	Decrease rate(%)	30	Yes	Decrease rate(%)	30	February-April 2020 (confinement period)
Yes			Mount Lebanon							Yes	I do not know		No			No			No			No			No			No			Yes	I do not know		No			February-April 2020 (confinement period)
Yes			Mount Lebanon							Yes	Decrease rate(%)	40	No			No			No			No			No			No			No			No			February-April 2020 (confinement period)
Yes			Mount Lebanon							Yes	I do not know		Yes	I do not know		Yes	I do not know		No			Yes	I do not know		Yes	I do not know		Yes	I do not know		Yes	I do not know		Yes	I do not know		February-April 2020 (confinement period)
Yes				Beirut						Yes	I do not know		No			Yes	I do not know		Yes	I do not know		Yes	I do not know		Yes	I do not know		Yes	I do not know		Yes	I do not know		Yes	I do not know		February-April 2020 (confinement period)
Yes			Mount Lebanon							Yes	Decrease rate(%)	50	Yes	Decrease rate(%)	100	No			Yes	Decrease rate(%)	100	Yes	Decrease rate(%)	50	Yes	Decrease rate(%)	70	Yes	Decrease rate(%)	50	No			Yes	Decrease rate(%)	70	February-April 2020 (confinement period)
Yes			Mount Lebanon	Beirut						Yes	Decrease rate(%)	70	I prefer not to answer			Yes	Decrease rate(%)	70	Yes	Decrease rate(%)	70	Yes	I do not know		I do not know			Yes	Decrease rate(%)	70	Yes	I do not know		Yes	Decrease rate(%)	75	February-April 2020 (confinement period)
Yes			Mount Lebanon							Yes	Decrease rate(%)	80	Yes	Decrease rate(%)	80	Yes	Decrease rate(%)	80	Yes	Decrease rate(%)	70	Yes	Decrease rate(%)	70	Yes	Decrease rate(%)	70	Yes	Decrease rate(%)	70	Yes	Decrease rate(%)	90	Yes	Decrease rate(%)	90	February-April 2020 (confinement period)
Yes			Mount Lebanon							Yes	Decrease rate(%)	50	Yes	Decrease rate(%)	50	Yes	Decrease rate(%)	50	Yes	Decrease rate(%)	40	Yes	Decrease rate(%)	40	Yes	Decrease rate(%)	40	Yes	Decrease rate(%)	40	Yes	Decrease rate(%)	40	Yes	Decrease rate(%)	50	February-April 2020 (confinement period)
Yes			Mount Lebanon							Yes	I do not know		I prefer not to answer			Yes	I do not know		Yes	I do not know		Yes	I do not know		Yes	I do not know		Yes	I do not know		Yes	I do not know		Yes	I do not know		February-April 2020 (confinement period)
Yes					South					Yes	I do not know		I do not know	Decrease rate(%)	30	Yes	Decrease rate(%)	30	I do not know	I do not know		Yes	Decrease rate(%)	40	Yes	Decrease rate(%)	40	Yes	Decrease rate(%)	30	Yes	I do not know		Yes	Decrease rate(%)	40	February-April 2020 (confinement period)
Yes				Beirut						Yes	Decrease rate(%)	90	I do not know			Yes	Decrease rate(%)	90	Yes	Decrease rate(%)	95	Yes	Decrease rate(%)	90	Yes	Decrease rate(%)	5	Yes	Decrease rate(%)	95	Yes	Decrease rate(%)	20	Yes	Decrease rate(%)	90	February-April 2020 (confinement period)
Yes		North								Yes	Decrease rate(%)	50	No			Yes	Decrease rate(%)	50	Yes	Decrease rate(%)	50	Yes	Decrease rate(%)	50	Yes	Decrease rate(%)	80	Yes	Decrease rate(%)	80	Yes	Decrease rate(%)	50	Yes	Decrease rate(%)	80	February-April 2020 (confinement period)
Yes			Mount Lebanon							Yes	Decrease rate(%)	40	I do not know			Yes	Decrease rate(%)	20	Yes	Decrease rate(%)	10	Yes	Decrease rate(%)	20	Yes	Decrease rate(%)	20	Yes	Decrease rate(%)	10	Yes	Decrease rate(%)	50	Yes	Decrease rate(%)	50	February-April 2020 (confinement period)
Yes			Mount Lebanon							Yes	I do not know		Yes	I do not know		Yes	I do not know		Yes	I do not know		Yes	I do not know		Yes	I do not know		Yes	I do not know		Yes	I do not know		Yes	I do not know		February-April 2020 (confinement period)
Yes			Mount Lebanon							Yes	Decrease rate(%)	20	No			No			No			No			No			No			No			Yes	Decrease rate(%)	15	February-April 2020 (confinement period)
Yes									I prefer not to answer	Yes	I do not know		Yes	I do not know		Yes	I do not know		Yes	I do not know		Yes	I do not know		Yes	I do not know		Yes	I do not know		Yes	I do not know		Yes	I do not know		February-April 2020 (confinement period)
Yes				Beirut						Yes	Decrease rate(%)	40	Yes	Decrease rate(%)	40	Yes	Decrease rate(%)	40	Yes	Decrease rate(%)	40	Yes	Decrease rate(%)	40	Yes	Decrease rate(%)	40	Yes	Decrease rate(%)	50	Yes	Decrease rate(%)	60	Yes	Decrease rate(%)	60	February-April 2020 (confinement period)
Yes			Mount Lebanon							Yes	I do not know		Yes	I do not know		Yes	I do not know		Yes	I do not know		Yes	I do not know		Yes	I do not know		Yes	I do not know		Yes	I do not know		Yes	I do not know		February-April 2020 (confinement period)
Yes					South					Yes	I prefer not to answer		Yes	I prefer not to answer		Yes	I prefer not to answer		Yes	I prefer not to answer		Yes	I prefer not to answer		Yes	I prefer not to answer		Yes	I prefer not to answer		Yes	I prefer not to answer		Yes	I prefer not to answer		February-April 2020 (confinement period)
Yes			Mount Lebanon							Yes	Decrease rate(%)	20	No			No			No			No			No			No			No			No			February-April 2020 (confinement period)
Yes							Nabatiyeh			Yes	Decrease rate(%)	80	I prefer not to answer			Yes	Decrease rate(%)	50	Yes	Decrease rate(%)	50	Yes	I do not know		Yes	Decrease rate(%)	50	Yes	Decrease rate(%)	50	Yes	Decrease rate(%)	50	Yes	Decrease rate(%)	50	February-April 2020 (confinement period)
Yes							Nabatiyeh			Yes	Decrease rate(%)	50	I prefer not to answer			Yes	Decrease rate(%)	30	Yes	Decrease rate(%)	30	Yes	Decrease rate(%)	35	Yes	Decrease rate(%)	35	Yes	Decrease rate(%)	35	Yes	Decrease rate(%)	70	Yes	Decrease rate(%)	70	February-April 2020 (confinement period)
Yes				Beirut						Yes	I do not know		Yes	Decrease rate(%)	60	Yes	Decrease rate(%)	60	Yes	Decrease rate(%)	70	Yes	Decrease rate(%)	60	Yes	Decrease rate(%)	70	Yes	Decrease rate(%)	50	Yes	Decrease rate(%)	70	Yes	Decrease rate(%)	80	February-April 2020 (confinement period)
Yes			Mount Lebanon							Yes	I do not know		Yes	Decrease rate(%)	30	Yes	I do not know		Yes	I do not know		Yes	I prefer not to answer		Yes	I prefer not to answer		No			Yes	I do not know		Yes	Decrease rate(%)	30	February-April 2020 (confinement period)
Yes			Mount Lebanon							Yes	I prefer not to answer		No			No			Yes	I do not know		No			No			Yes	I do not know		Yes	I do not know		No			February-April 2020 (confinement period)
Yes			Mount Lebanon	Beirut						Yes	I do not know		Yes	I do not know		Yes	I do not know		Yes	I do not know		Yes	I do not know		Yes	I do not know		Yes	I do not know		Yes	I do not know		Yes	I do not know		February-April 2020 (confinement period)
Yes			Mount Lebanon							Yes	I do not know		Yes	I do not know		No			No			No			No			No			Yes	I do not know		No			February-April 2020 (confinement period)
Yes			Mount Lebanon							Yes	Decrease rate(%)	50	Yes	I do not know		Yes	I do not know		Yes	I do not know		Yes	I do not know		Yes	I do not know		Yes	I do not know		Yes	I do not know		Yes	I do not know		February-April 2020 (confinement period)
Yes			Mount Lebanon							Yes	I do not know		No			No			Yes	I do not know		No			No			Yes	I do not know		Yes	I do not know		Yes	I prefer not to answer		February-April 2020 (confinement period)
Yes			Mount Lebanon							Yes	Decrease rate(%)	50	I do not know			Yes	Decrease rate(%)	25	No			Yes	Decrease rate(%)	25	Yes	Decrease rate(%)	25	No			Yes	Decrease rate(%)	25	Yes	Decrease rate(%)	50	February-April 2020 (confinement period)
Yes			Mount Lebanon	Beirut						Yes	Decrease rate(%)	30	No			Yes	Decrease rate(%)	30	Yes	Decrease rate(%)	30	Yes	Decrease rate(%)	30	Yes	Decrease rate(%)	30	Yes	Decrease rate(%)	20	Yes	Decrease rate(%)	40	Yes	Decrease rate(%)	50	February-April 2020 (confinement period)
Yes			Mount Lebanon							Yes	Decrease rate(%)	40	No			Yes	Decrease rate(%)	20	No			Yes	Decrease rate(%)	20	No			Yes	Decrease rate(%)	10	No			Yes	Decrease rate(%)	25	February-April 2020 (confinement period)
Yes			Mount Lebanon							Yes	I do not know		Yes	I do not know		Yes	I do not know		Yes	I do not know		Yes	I do not know		Yes	I do not know		Yes	I do not know		Yes	I do not know		Yes	I do not know		February-April 2020 (confinement period)
Yes				Beirut						Yes	Decrease rate(%)	50	No			Yes	I do not know		Yes	I do not know		Yes	I do not know		Yes	I do not know		Yes	I do not know		Yes	I do not know		Yes	I do not know		December 2019-January 2020
Yes					South					Yes	I do not know		Yes	Decrease rate(%)	30	Yes	Decrease rate(%)	30	Yes	Decrease rate(%)	30	Yes	Decrease rate(%)	30	Yes	Decrease rate(%)	30	Yes	Decrease rate(%)	30	Yes	Decrease rate(%)	30	Yes	Decrease rate(%)	30	December 2019-January 2020
Yes						Bekaa				Yes	I do not know		I do not know			I do not know			I do not know			I do not know			I do not know			Yes	I do not know		I do not know			I do not know			December 2019-January 2020
Yes				Beirut						Yes	Decrease rate(%)	30	I prefer not to answer			No			No			No			No			No			No			Yes	I do not know		December 2019-January 2020
Yes			Mount Lebanon							Yes	I prefer not to answer		Yes	Decrease rate(%)	85	I prefer not to answer			I prefer not to answer			I prefer not to answer			I prefer not to answer			I prefer not to answer			I prefer not to answer			Yes	Decrease rate(%)	85	December 2019-January 2020
Yes				Beirut						Yes	I do not know		Yes	I do not know		Yes	I do not know		Yes	I do not know		Yes	I do not know		Yes	I do not know		Yes	I do not know		Yes	I do not know		Yes	I do not know		December 2019-January 2020
Yes					South					Yes	Decrease rate(%)	70	Yes	Decrease rate(%)	40	Yes	Decrease rate(%)	40	Yes	Decrease rate(%)	50	Yes	Decrease rate(%)	40	Yes	Decrease rate(%)	40	Yes	Decrease rate(%)	50	Yes	Decrease rate(%)	60	Yes	Decrease rate(%)	60	December 2019-January 2020
Yes				Beirut						Yes	Decrease rate(%)	50	I do not know			Yes	Decrease rate(%)	50	Yes	Decrease rate(%)	50	Yes	Decrease rate(%)	50	Yes	Decrease rate(%)	50	Yes	Decrease rate(%)	50	Yes	Decrease rate(%)	50	Yes	Decrease rate(%)	50	October-November 2019
Yes				Beirut						Yes	I do not know		No			No			No			No			No			No			Yes	I do not know		Yes	I do not know		October-November 2019
Yes						Bekaa				Yes	I do not know		Yes	Decrease rate(%)	50	Yes	Decrease rate(%)	50	Yes	Decrease rate(%)	50	Yes	Decrease rate(%)	50	Yes	Decrease rate(%)	50	Yes	Decrease rate(%)	50	Yes	Decrease rate(%)	50	Yes	Decrease rate(%)	50	I do not know
Yes					South					Yes	I do not know		Yes	I do not know		Yes	I do not know		Yes	I do not know		Yes	I do not know		Yes	I do not know		Yes	I do not know		Yes	I do not know		Yes	I do not know		I do not know
Yes			Mount Lebanon							Yes	Decrease rate(%)	20	No			No			No			No			No			No			No			Yes	Decrease rate(%)	30	February-April 2020 (confinement period)
Yes			Mount Lebanon	Beirut						Yes	Decrease rate(%)	30	No			No			Yes	Decrease rate(%)	25	No			No			No			Yes	Decrease rate(%)	50	No			February-April 2020 (confinement period)
Yes			Mount Lebanon							Yes	Decrease rate(%)	20	I do not know			No			I do not know	Decrease rate(%)	30	No			No			Yes	Decrease rate(%)	30	No			No			February-April 2020 (confinement period)
Yes		North								Yes	I do not know		No			No			Yes	I do not know		No			No			Yes	I do not know		No			Yes	I do not know		February-April 2020 (confinement period)
Yes			Mount Lebanon							Yes	I do not know		No			Yes	I do not know		Yes	I do not know		Yes	I do not know		Yes	I do not know		Yes	I do not know		Yes	I do not know		Yes	I do not know		February-April 2020 (confinement period)
Yes				Beirut						Yes	I do not know		Yes	I do not know		Yes	I do not know		Yes	I do not know		Yes	I do not know		Yes	I do not know		Yes	I do not know		Yes	I do not know		Yes	I do not know		February-April 2020 (confinement period)
Yes							Nabatiyeh			Yes	Decrease rate(%)	50	Yes	Decrease rate(%)	30	No			No			No			No			No			Yes	Decrease rate(%)	50	Yes	Decrease rate(%)	60	February-April 2020 (confinement period)
Yes		North								Yes	Decrease rate(%)	50	Yes	Decrease rate(%)	50	Yes	Decrease rate(%)	50	Yes	Decrease rate(%)	50	Yes	Decrease rate(%)	50	Yes	Decrease rate(%)	50	Yes	Decrease rate(%)	50	Yes	Decrease rate(%)	90	Yes	Decrease rate(%)	60	February-April 2020 (confinement period)
Yes		North								Yes	Decrease rate(%)	5	I do not know			No			No			No			No			Yes	I do not know		Yes	I do not know		No			February-April 2020 (confinement period)
Yes		North								Yes	Decrease rate(%)	45	I do not know			Yes	Decrease rate(%)	20	Yes	Decrease rate(%)	10	Yes	Decrease rate(%)	10	Yes	Decrease rate(%)	10	Yes	Decrease rate(%)	10	Yes	Decrease rate(%)	20	No			February-April 2020 (confinement period)
Yes			Mount Lebanon				Nabatiyeh			Yes	Decrease rate(%)	75	Yes	Decrease rate(%)	75	Yes	Decrease rate(%)	75	Yes	Decrease rate(%)	75	Yes	Decrease rate(%)	75	Yes	Decrease rate(%)	75	Yes	Decrease rate(%)	75	Yes	Decrease rate(%)	90	Yes	Decrease rate(%)	90	February-April 2020 (confinement period)
Yes			Mount Lebanon							Yes	Decrease rate(%)	40	No			No			No			No			No			No			Yes	Decrease rate(%)	40	No			February-April 2020 (confinement period)
Yes					South					Yes	Decrease rate(%)	60	Yes	Decrease rate(%)	60	Yes	Decrease rate(%)	60	Yes	Decrease rate(%)	40	Yes	Decrease rate(%)	40	Yes	Decrease rate(%)	40	Yes	Decrease rate(%)	60	Yes	Decrease rate(%)	80	Yes	Decrease rate(%)	50	February-April 2020 (confinement period)
Yes					South					Yes	Decrease rate(%)	30	Yes	Decrease rate(%)	70	No			Yes	Decrease rate(%)	30	Yes	Decrease rate(%)	30	Yes	Decrease rate(%)	30	Yes	Decrease rate(%)	30	Yes	Decrease rate(%)	40	Yes	Decrease rate(%)	50	February-April 2020 (confinement period)
Yes			Mount Lebanon							Yes	Decrease rate(%)	50	I prefer not to answer	Decrease rate(%)	50	Yes	Decrease rate(%)	50	Yes	Decrease rate(%)	50	Yes	Decrease rate(%)	50	Yes	Decrease rate(%)	50	Yes	Decrease rate(%)	50	Yes	Decrease rate(%)	50	Yes	Decrease rate(%)	50	February-April 2020 (confinement period)
Yes			Mount Lebanon							Yes	Decrease rate(%)	25	No			No			Yes	Decrease rate(%)	25	No			No			Yes	Decrease rate(%)	25	Yes	Decrease rate(%)	25	Yes	Decrease rate(%)	30	February-April 2020 (confinement period)
Yes				Beirut						Yes	Decrease rate(%)	30	Yes	Decrease rate(%)	30	Yes	Decrease rate(%)	30	Yes	Decrease rate(%)	40	Yes	Decrease rate(%)	30	Yes	Decrease rate(%)	30	Yes	Decrease rate(%)	40	Yes	Decrease rate(%)	30	Yes	Decrease rate(%)	40	February-April 2020 (confinement period)
Yes				Beirut	South					Yes	Decrease rate(%)	70	Yes	Decrease rate(%)	70	Yes	Decrease rate(%)	70	Yes	Decrease rate(%)	80	Yes	Decrease rate(%)	70	Yes	Decrease rate(%)	60	Yes	Decrease rate(%)	80	Yes	Decrease rate(%)	90	Yes	Decrease rate(%)	65	February-April 2020 (confinement period)
Yes			Mount Lebanon	Beirut						Yes	Decrease rate(%)	70	Yes	I do not know		Yes	Decrease rate(%)	70	Yes	Decrease rate(%)	70	Yes	Decrease rate(%)	70	Yes	Decrease rate(%)	70	Yes	Decrease rate(%)	50	Yes	Decrease rate(%)	80	Yes	I do not know		February-April 2020 (confinement period)
Yes			Mount Lebanon							Yes	Decrease rate(%)	30	No			No			No			No			No			No			Yes	Decrease rate(%)	30	Yes	Decrease rate(%)	50	February-April 2020 (confinement period)
Yes			Mount Lebanon							Yes	Decrease rate(%)	30	No			Yes	Decrease rate(%)	30	No			No			No			No			No			Yes	I do not know		February-April 2020 (confinement period)
Yes						Bekaa				Yes	I do not know		No			Yes	I do not know		No			Yes	I do not know		No			No			Yes	I do not know		Yes	Decrease rate(%)	50	February-April 2020 (confinement period)
Yes					South					Yes	I do not know		Yes	I do not know		Yes	I do not know		Yes	I do not know		Yes	I do not know		Yes	I do not know		Yes	I do not know		Yes	I do not know		Yes	I do not know		February-April 2020 (confinement period)
Yes						Bekaa				Yes	Decrease rate(%)	30	No			Yes	Decrease rate(%)	30	Yes	Decrease rate(%)	100	Yes	Decrease rate(%)	30	Yes	Decrease rate(%)	30	No			Yes	Decrease rate(%)	15	Yes	Decrease rate(%)	30	February-April 2020 (confinement period)
Yes			Mount Lebanon	Beirut						Yes	Decrease rate(%)	40	No			Yes	I do not know		I do not know			No	I do not know		No			No			Yes	Decrease rate(%)	20	Yes	I do not know		February-April 2020 (confinement period)
Yes			Mount Lebanon							Yes	Decrease rate(%)	50	Yes	I do not know		Yes	I do not know		Yes	I do not know		Yes	I do not know		Yes	I do not know		Yes	I do not know		Yes	I do not know		Yes	I do not know		February-April 2020 (confinement period)
Yes				Beirut						Yes	Decrease rate(%)	90	Yes	I do not know		Yes	Decrease rate(%)	90	Yes	Decrease rate(%)	90	Yes	Decrease rate(%)	90	Yes	Decrease rate(%)	90	Yes	Decrease rate(%)	90	Yes	Decrease rate(%)	90	Yes	Decrease rate(%)	90	February-April 2020 (confinement period)
Yes				Beirut						Yes	Decrease rate(%)	70	Yes	Decrease rate(%)	70	Yes	Decrease rate(%)	70	Yes	Decrease rate(%)	80	Yes	Decrease rate(%)	70	Yes	Decrease rate(%)	70	Yes	Decrease rate(%)	90	Yes	Decrease rate(%)	80	Yes	Decrease rate(%)	80	February-April 2020 (confinement period)
Yes			Mount Lebanon							Yes	Decrease rate(%)	20	No			No			No			Yes	Decrease rate(%)	10	No			No			Yes	Decrease rate(%)	60	No			February-April 2020 (confinement period)
Yes			Mount Lebanon							Yes	Decrease rate(%)	50	I do not know			No			No			No			No			No			Yes	Decrease rate(%)	30	No			February-April 2020 (confinement period)
Yes			Mount Lebanon							Yes	I do not know		No			Yes	I do not know		No			Yes	I do not know		No			No			No			Yes	I do not know		February-April 2020 (confinement period)
Yes			Mount Lebanon							Yes	Decrease rate(%)	40	No			Yes	Decrease rate(%)	40	Yes	Decrease rate(%)	80	Yes	Decrease rate(%)	40	Yes	Decrease rate(%)	40	Yes	Decrease rate(%)	40	Yes	Decrease rate(%)	50	No			February-April 2020 (confinement period)
Yes				Beirut						Yes	I prefer not to answer		Yes	I prefer not to answer		Yes	I prefer not to answer		Yes	I prefer not to answer		Yes	I prefer not to answer		Yes	I prefer not to answer		Yes	I prefer not to answer		Yes	I prefer not to answer		Yes	I prefer not to answer		February-April 2020 (confinement period)
Yes			Mount Lebanon							Yes	Decrease rate(%)	35	Yes	Decrease rate(%)	35	Yes	Decrease rate(%)	35	Yes	I do not know		Yes	I do not know		Yes	Decrease rate(%)	75	Yes	I do not know		I prefer not to answer			I prefer not to answer			February-April 2020 (confinement period)
Yes			Mount Lebanon							Yes	Decrease rate(%)	40	No			No			No			No			No			No			Yes	Decrease rate(%)	50	No			February-April 2020 (confinement period)
Yes		North								Yes	Decrease rate(%)	70	Yes	Decrease rate(%)	80	Yes	Decrease rate(%)	75	Yes	Decrease rate(%)	80	Yes	Decrease rate(%)	80	Yes	Decrease rate(%)	80	Yes	Decrease rate(%)	85	Yes	Decrease rate(%)	90	Yes	Decrease rate(%)	90	February-April 2020 (confinement period)
Yes		North								Yes	Decrease rate(%)	80	Yes	Decrease rate(%)	80	Yes	Decrease rate(%)	80	Yes	Decrease rate(%)	80	Yes	Decrease rate(%)	80	Yes	Decrease rate(%)	80	Yes	Decrease rate(%)	80	Yes	Decrease rate(%)	80	Yes	Decrease rate(%)	80	February-April 2020 (confinement period)
Yes			Mount Lebanon							Yes	I do not know		Yes	I do not know		Yes	I do not know		Yes	I do not know		Yes	I do not know		Yes	I do not know		Yes	I do not know		Yes	I do not know		Yes	I do not know		February-April 2020 (confinement period)
Yes			Mount Lebanon							Yes	Decrease rate(%)	50	Yes	Decrease rate(%)	50	Yes	Decrease rate(%)	40	I prefer not to answer	Decrease rate(%)	50	Yes	Decrease rate(%)	40	Yes	Decrease rate(%)	60	Yes	Decrease rate(%)	50	Yes	Decrease rate(%)	70	Yes	Decrease rate(%)	80	February-April 2020 (confinement period)
Yes						Bekaa				Yes	Decrease rate(%)	50	Yes	Decrease rate(%)	50	Yes	Decrease rate(%)	50	Yes	Decrease rate(%)	50	Yes	Decrease rate(%)	50	Yes	Decrease rate(%)	50	Yes	Decrease rate(%)	40	Yes	Decrease rate(%)	60	Yes	Decrease rate(%)	70	February-April 2020 (confinement period)
Yes				Beirut						Yes	Decrease rate(%)	30	I prefer not to answer			Yes	Decrease rate(%)	30	Yes	Decrease rate(%)	30	Yes	Decrease rate(%)	30	No			No			No			I prefer not to answer			February-April 2020 (confinement period)
Yes					South					Yes	Decrease rate(%)	50	Yes	Decrease rate(%)	100	Yes	Decrease rate(%)	50	Yes	Decrease rate(%)	50	Yes	Decrease rate(%)	50	Yes	Decrease rate(%)	50	Yes	Decrease rate(%)	50	Yes	Decrease rate(%)	50	Yes	Decrease rate(%)	50	February-April 2020 (confinement period)
Yes			Mount Lebanon							Yes	I do not know		No			No			No			No			No			No			No			No			February-April 2020 (confinement period)
Yes		North								Yes	Decrease rate(%)	70	No			No			No			Yes	Decrease rate(%)	40	No			No			Yes	Decrease rate(%)	50	Yes	Decrease rate(%)	40	February-April 2020 (confinement period)
Yes			Mount Lebanon							Yes	Decrease rate(%)	30	I do not know			Yes	Decrease rate(%)	30	Yes	Decrease rate(%)	30	Yes	Decrease rate(%)	30	Yes	Decrease rate(%)	30	Yes	Decrease rate(%)	30	Yes	Decrease rate(%)	30	Yes	Decrease rate(%)	30	February-April 2020 (confinement period)
Yes			Mount Lebanon							Yes	I do not know		No			No			No			No			No			No			Yes	I do not know		No			February-April 2020 (confinement period)
Yes			Mount Lebanon							Yes	Decrease rate(%)	40	No			No			No			No			No			No			No			No			February-April 2020 (confinement period)
Yes			Mount Lebanon							Yes	I do not know		Yes	I do not know		Yes	I do not know		No			Yes	I do not know		Yes	I do not know		Yes	I do not know		Yes	I do not know		Yes	I do not know		February-April 2020 (confinement period)
Yes				Beirut						Yes	I do not know		No			Yes	I do not know		Yes	I do not know		Yes	I do not know		Yes	I do not know		Yes	I do not know		Yes	I do not know		Yes	I do not know		February-April 2020 (confinement period)
Yes			Mount Lebanon							Yes	Decrease rate(%)	50	Yes	Decrease rate(%)	100	No			Yes	Decrease rate(%)	100	Yes	Decrease rate(%)	50	Yes	Decrease rate(%)	70	Yes	Decrease rate(%)	50	No			Yes	Decrease rate(%)	70	February-April 2020 (confinement period)
Yes			Mount Lebanon	Beirut						Yes	Decrease rate(%)	70	I prefer not to answer			Yes	Decrease rate(%)	70	Yes	Decrease rate(%)	70	Yes	I do not know		I do not know			Yes	Decrease rate(%)	70	Yes	I do not know		Yes	Decrease rate(%)	75	February-April 2020 (confinement period)
Yes			Mount Lebanon							Yes	Decrease rate(%)	80	Yes	Decrease rate(%)	80	Yes	Decrease rate(%)	80	Yes	Decrease rate(%)	70	Yes	Decrease rate(%)	70	Yes	Decrease rate(%)	70	Yes	Decrease rate(%)	70	Yes	Decrease rate(%)	90	Yes	Decrease rate(%)	90	February-April 2020 (confinement period)
Yes			Mount Lebanon							Yes	Decrease rate(%)	50	Yes	Decrease rate(%)	50	Yes	Decrease rate(%)	50	Yes	Decrease rate(%)	40	Yes	Decrease rate(%)	40	Yes	Decrease rate(%)	40	Yes	Decrease rate(%)	40	Yes	Decrease rate(%)	40	Yes	Decrease rate(%)	50	February-April 2020 (confinement period)
Yes			Mount Lebanon							Yes	I do not know		I prefer not to answer			Yes	I do not know		Yes	I do not know		Yes	I do not know		Yes	I do not know		Yes	I do not know		Yes	I do not know		Yes	I do not know		February-April 2020 (confinement period)
Yes					South					Yes	I do not know		I do not know	Decrease rate(%)	30	Yes	Decrease rate(%)	30	I do not know	I do not know		Yes	Decrease rate(%)	40	Yes	Decrease rate(%)	40	Yes	Decrease rate(%)	30	Yes	I do not know		Yes	Decrease rate(%)	40	February-April 2020 (confinement period)
Yes				Beirut						Yes	Decrease rate(%)	90	I do not know			Yes	Decrease rate(%)	90	Yes	Decrease rate(%)	95	Yes	Decrease rate(%)	90	Yes	Decrease rate(%)	5	Yes	Decrease rate(%)	95	Yes	Decrease rate(%)	20	Yes	Decrease rate(%)	90	February-April 2020 (confinement period)
Yes		North								Yes	Decrease rate(%)	50	No			Yes	Decrease rate(%)	50	Yes	Decrease rate(%)	50	Yes	Decrease rate(%)	50	Yes	Decrease rate(%)	80	Yes	Decrease rate(%)	80	Yes	Decrease rate(%)	50	Yes	Decrease rate(%)	80	February-April 2020 (confinement period)
Yes			Mount Lebanon							Yes	Decrease rate(%)	40	I do not know			Yes	Decrease rate(%)	20	Yes	Decrease rate(%)	10	Yes	Decrease rate(%)	20	Yes	Decrease rate(%)	20	Yes	Decrease rate(%)	10	Yes	Decrease rate(%)	50	Yes	Decrease rate(%)	50	February-April 2020 (confinement period)
Yes			Mount Lebanon							Yes	I do not know		Yes	I do not know		Yes	I do not know		Yes	I do not know		Yes	I do not know		Yes	I do not know		Yes	I do not know		Yes	I do not know		Yes	I do not know		February-April 2020 (confinement period)
Yes			Mount Lebanon							Yes	Decrease rate(%)	20	No			No			No			No			No			No			No			Yes	Decrease rate(%)	15	February-April 2020 (confinement period)
Yes									I prefer not to answer	Yes	I do not know		Yes	I do not know		Yes	I do not know		Yes	I do not know		Yes	I do not know		Yes	I do not know		Yes	I do not know		Yes	I do not know		Yes	I do not know		February-April 2020 (confinement period)
Yes				Beirut						Yes	Decrease rate(%)	40	Yes	Decrease rate(%)	40	Yes	Decrease rate(%)	40	Yes	Decrease rate(%)	40	Yes	Decrease rate(%)	40	Yes	Decrease rate(%)	40	Yes	Decrease rate(%)	50	Yes	Decrease rate(%)	60	Yes	Decrease rate(%)	60	February-April 2020 (confinement period)
Yes			Mount Lebanon							Yes	I do not know		Yes	I do not know		Yes	I do not know		Yes	I do not know		Yes	I do not know		Yes	I do not know		Yes	I do not know		Yes	I do not know		Yes	I do not know		February-April 2020 (confinement period)
Yes					South					Yes	I prefer not to answer		Yes	I prefer not to answer		Yes	I prefer not to answer		Yes	I prefer not to answer		Yes	I prefer not to answer		Yes	I prefer not to answer		Yes	I prefer not to answer		Yes	I prefer not to answer		Yes	I prefer not to answer		February-April 2020 (confinement period)
Yes			Mount Lebanon							Yes	Decrease rate(%)	20	No			No			No			No			No			No			No			No			February-April 2020 (confinement period)
Yes							Nabatiyeh			Yes	Decrease rate(%)	80	I prefer not to answer			Yes	Decrease rate(%)	50	Yes	Decrease rate(%)	50	Yes	I do not know		Yes	Decrease rate(%)	50	Yes	Decrease rate(%)	50	Yes	Decrease rate(%)	50	Yes	Decrease rate(%)	50	February-April 2020 (confinement period)
Yes							Nabatiyeh			Yes	Decrease rate(%)	50	I prefer not to answer			Yes	Decrease rate(%)	30	Yes	Decrease rate(%)	30	Yes	Decrease rate(%)	35	Yes	Decrease rate(%)	35	Yes	Decrease rate(%)	35	Yes	Decrease rate(%)	70	Yes	Decrease rate(%)	70	February-April 2020 (confinement period)
Yes				Beirut						Yes	I do not know		Yes	Decrease rate(%)	60	Yes	Decrease rate(%)	60	Yes	Decrease rate(%)	70	Yes	Decrease rate(%)	60	Yes	Decrease rate(%)	70	Yes	Decrease rate(%)	50	Yes	Decrease rate(%)	70	Yes	Decrease rate(%)	80	February-April 2020 (confinement period)
Yes			Mount Lebanon							Yes	I do not know		Yes	Decrease rate(%)	30	Yes	I do not know		Yes	I do not know		Yes	I prefer not to answer		Yes	I prefer not to answer		No			Yes	I do not know		Yes	Decrease rate(%)	30	February-April 2020 (confinement period)
Yes			Mount Lebanon							Yes	I prefer not to answer		No			No			Yes	I do not know		No			No			Yes	I do not know		Yes	I do not know		No			February-April 2020 (confinement period)
Yes			Mount Lebanon	Beirut						Yes	I do not know		Yes	I do not know		Yes	I do not know		Yes	I do not know		Yes	I do not know		Yes	I do not know		Yes	I do not know		Yes	I do not know		Yes	I do not know		February-April 2020 (confinement period)
Yes			Mount Lebanon							Yes	I do not know		Yes	I do not know		No			No			No			No			No			Yes	I do not know		No			February-April 2020 (confinement period)
Yes			Mount Lebanon							Yes	Decrease rate(%)	50	Yes	I do not know		Yes	I do not know		Yes	I do not know		Yes	I do not know		Yes	I do not know		Yes	I do not know		Yes	I do not know		Yes	I do not know		February-April 2020 (confinement period)
Yes			Mount Lebanon							Yes	I do not know		No			No			Yes	I do not know		No			No			Yes	I do not know		Yes	I do not know		Yes	I prefer not to answer		February-April 2020 (confinement period)
Yes			Mount Lebanon							Yes	Decrease rate(%)	50	I do not know			Yes	Decrease rate(%)	25	No			Yes	Decrease rate(%)	25	Yes	Decrease rate(%)	25	No			Yes	Decrease rate(%)	25	Yes	Decrease rate(%)	50	February-April 2020 (confinement period)
Yes			Mount Lebanon	Beirut						Yes	Decrease rate(%)	30	No			Yes	Decrease rate(%)	30	Yes	Decrease rate(%)	30	Yes	Decrease rate(%)	30	Yes	Decrease rate(%)	30	Yes	Decrease rate(%)	20	Yes	Decrease rate(%)	40	Yes	Decrease rate(%)	50	February-April 2020 (confinement period)
Yes			Mount Lebanon							Yes	Decrease rate(%)	40	No			Yes	Decrease rate(%)	20	No			Yes	Decrease rate(%)	20	No			Yes	Decrease rate(%)	10	No			Yes	Decrease rate(%)	25	February-April 2020 (confinement period)
Yes			Mount Lebanon							Yes	I do not know		Yes	I do not know		Yes	I do not know		Yes	I do not know		Yes	I do not know		Yes	I do not know		Yes	I do not know		Yes	I do not know		Yes	I do not know		February-April 2020 (confinement period)
Yes				Beirut						Yes	Decrease rate(%)	50	No			Yes	I do not know		Yes	I do not know		Yes	I do not know		Yes	I do not know		Yes	I do not know		Yes	I do not know		Yes	I do not know		December 2019-January 2020
Yes					South					Yes	I do not know		Yes	Decrease rate(%)	30	Yes	Decrease rate(%)	30	Yes	Decrease rate(%)	30	Yes	Decrease rate(%)	30	Yes	Decrease rate(%)	30	Yes	Decrease rate(%)	30	Yes	Decrease rate(%)	30	Yes	Decrease rate(%)	30	December 2019-January 2020
Yes						Bekaa				Yes	I do not know		I do not know			I do not know			I do not know			I do not know			I do not know			Yes	I do not know		I do not know			I do not know			December 2019-January 2020
Yes				Beirut						Yes	Decrease rate(%)	30	I prefer not to answer			No			No			No			No			No			No			Yes	I do not know		December 2019-January 2020
Yes			Mount Lebanon							Yes	I prefer not to answer		Yes	Decrease rate(%)	85	I prefer not to answer			I prefer not to answer			I prefer not to answer			I prefer not to answer			I prefer not to answer			I prefer not to answer			Yes	Decrease rate(%)	85	December 2019-January 2020
Yes				Beirut						Yes	I do not know		Yes	I do not know		Yes	I do not know		Yes	I do not know		Yes	I do not know		Yes	I do not know		Yes	I do not know		Yes	I do not know		Yes	I do not know		December 2019-January 2020
Yes					South					Yes	Decrease rate(%)	70	Yes	Decrease rate(%)	40	Yes	Decrease rate(%)	40	Yes	Decrease rate(%)	50	Yes	Decrease rate(%)	40	Yes	Decrease rate(%)	40	Yes	Decrease rate(%)	50	Yes	Decrease rate(%)	60	Yes	Decrease rate(%)	60	December 2019-January 2020
Yes				Beirut						Yes	Decrease rate(%)	50	I do not know			Yes	Decrease rate(%)	50	Yes	Decrease rate(%)	50	Yes	Decrease rate(%)	50	Yes	Decrease rate(%)	50	Yes	Decrease rate(%)	50	Yes	Decrease rate(%)	50	Yes	Decrease rate(%)	50	October-November 2019
Yes				Beirut						Yes	I do not know		No			No			No			No			No			No			Yes	I do not know		Yes	I do not know		October-November 2019
Yes					South					I do not know
Yes			Mount Lebanon							I do not know
Yes			Mount Lebanon	Beirut	South					I do not know
Yes				Beirut						I do not know
Yes			Mount Lebanon	Beirut						I do not know
Yes				Beirut						No
Yes				Beirut						No
Yes					South					No
Yes		North								No
Yes		North								No
Yes					South					No
Yes			Mount Lebanon							No
Yes					South					No
Yes		North	Mount Lebanon	Beirut						No
Yes			Mount Lebanon							No
Yes			Mount Lebanon							No
Yes			Mount Lebanon							No
Yes			Mount Lebanon							No
Yes			Mount Lebanon							No
Yes						Bekaa				No
Yes			Mount Lebanon							No
Yes					South					No
Yes			Mount Lebanon							No
Yes				Beirut						No
Yes			Mount Lebanon							No
Yes				Beirut						No
Yes					South					I do not know
Yes			Mount Lebanon							I do not know
Yes			Mount Lebanon	Beirut	South					I do not know
Yes				Beirut						I do not know
Yes			Mount Lebanon	Beirut						I do not know
Yes				Beirut						No
Yes				Beirut						No
Yes					South					No
Yes		North								No
Yes		North								No
Yes					South					No
Yes			Mount Lebanon							No
Yes					South					No
Yes		North	Mount Lebanon	Beirut						No
Yes			Mount Lebanon							No
Yes			Mount Lebanon							No
Yes			Mount Lebanon							No
Yes			Mount Lebanon							No
Yes			Mount Lebanon							No
Yes						Bekaa				No
Yes			Mount Lebanon							No
Yes					South					No
Yes			Mount Lebanon							No
Yes				Beirut						No
Yes			Mount Lebanon							No
Yes				Beirut						No
Yes					South					I do not know
Yes			Mount Lebanon							I do not know
Yes			Mount Lebanon	Beirut	South					I do not know
Yes				Beirut						I do not know
Yes			Mount Lebanon	Beirut						I do not know
Yes				Beirut						No
Yes				Beirut						No
Yes					South					No
Yes		North								No
Yes		North								No
Yes					South					No
Yes			Mount Lebanon							No
Yes					South					No
Yes		North	Mount Lebanon	Beirut						No
Yes			Mount Lebanon							No
Yes			Mount Lebanon							No
Yes			Mount Lebanon							No
Yes			Mount Lebanon							No
Yes			Mount Lebanon							No
Yes						Bekaa				No
Yes			Mount Lebanon							No
Yes					South					No
Yes			Mount Lebanon							No
Yes				Beirut						No
Yes			Mount Lebanon							No
Yes				Beirut						No
No
No
No
No
No
No
No
No
No
No
No
No
No
No
No
No
No
No
No
No
No
No
No
No
I prefer not to answer
I prefer not to answer
I prefer not to answer
I prefer not to answer
I prefer not to answer
I prefer not to answer
I prefer not to answer
I prefer not to answer
I prefer not to answer
I prefer not to answer
I prefer not to answer
I prefer not to answer
I prefer not to answer
I prefer not to answer
I prefer not to answer
